# Supplementary material
Source: Elsevier journal article supplement (https://www.sciencedirect.com/science/article/pii/S2387020620306069)
Supplement: mmc2 [file S2387020620306069:mmc2.docx]

Table S2a. The mortality from vascular events among cancer survivors stratified by the time from diagnosis.

|  | <12months | 12-35 months | 36-59 months | ≥60 months |
| --- | --- | --- | --- | --- |
| Stomach | 4.9% | 4.1% | 6.2% | 10.5% |
| Colon and Rectum | 8.3% | 6.6% | 8.0% | 10.3% |
| Liver | 2.5% | 2.6% | 1.7% | 2.7% |
| Lung and Bronchus | 4.1% | 3.0% | 5.1% | 6.8% |
| Non-Epithelial Skin | 9.7% | 10.0% | 11.0% | 12.9% |
| Breast | 5.1% | 5.0% | 5.8% | 5.6% |
| Cervix Uteri | 2.6% | 2.8% | 4.9% | 4.7% |
| Prostate | 8.0% | 8.1% | 10.1% | 10.0% |
| Non-Hodgkin Lymphoma | 5.9% | 5.2% | 8.0% | 7.5% |
| Leukemia | 5.4% | 4.7% | 6.4% | 6.4% |
| All cancers | 6.0% | 4.8% | 7.1% | 7.9% |

Table S2b. The cumulative mortality from vascular events among cancer survivors.

|  | <12months | <36 months | <60 months | Overall |
| --- | --- | --- | --- | --- |
| Stomach | 4.9% | 9.0% | 15.2% | 25.7% |
| Colon and Rectum | 8.3% | 14.9% | 22.9% | 33.2% |
| Liver | 2.5% | 5.1% | 6.8% | 9.5% |
| Lung and Bronchus | 4.1% | 7.2% | 12.3% | 19.1% |
| Non-Epithelial Skin | 9.7% | 19.7% | 30.7% | 43.6% |
| Breast | 5.1% | 10.0% | 15.8% | 21.4% |
| Cervix Uteri | 2.6% | 5.4% | 10.3% | 15.0% |
| Prostate | 8.0% | 16.0% | 26.1% | 36.1% |
| Non-Hodgkin Lymphoma | 5.9% | 11.0% | 19.1% | 26.6% |
| Leukemia | 5.4% | 10.1% | 16.5% | 22.9% |
| All cancers | 6.0% | 10.8% | 17.9% | 25.8% |
